# Supplementary material for: Metataxonomics of Internal Transcribed Spacer amplicons in cerebrospinal fluid for diagnosing and genotyping of cryptococcal meningitis
Source: PubMed Central journal article supplement — Chin Med J (Engl). 2019 Dec 5;132(23):2827–34. doi: 10.1097/CM9.0000000000000541 (PMC6940084; doi:10.1097/cm9.0000000000000541), 2019-12-05
Supplement: cm9-132-2827-s001.pdf [file cm9-132-2827-s001.pdf]

|                             |        |        |        |       |        |        |        |        |        |        |        |   |    |    |    |         |
|-----------------------------|--------|--------|--------|-------|--------|--------|--------|--------|--------|--------|--------|---|----|----|----|---------|
| Cladosporium velox          | 5      | 0      | 0      | 0     | 0      | 0      | 0      | 0      | 0      | 0      | 0      | 0 | 0  | 0  | 0  | 5       |
| Solicoccozyma terricola     | 5      | 0      | 0      | 0     | 0      | 0      | 0      | 0      | 0      | 0      | 0      | 0 | 0  | 0  | 0  | 5       |
| Tetracladium maxilliforme   | 0      | 5      | 0      | 0     | 0      | 0      | 0      | 0      | 0      | 0      | 0      | 0 | 0  | 0  | 0  | 5       |
| Candida orthopsilosis       | 0      | 0      | 0      | 0     | 0      | 0      | 0      | 0      | 0      | 0      | 4      | 0 | 0  | 0  | 0  | 4       |
| Candida parapsilosis        | 0      | 0      | 0      | 0     | 0      | 0      | 0      | 0      | 0      | 0      | 4      | 0 | 0  | 0  | 0  | 4       |
| Mortierella antarctica      | 4      | 0      | 0      | 0     | 0      | 0      | 0      | 0      | 0      | 0      | 0      | 0 | 0  | 0  | 0  | 4       |
| Malasseziales sp            | 0      | 1      | 0      | 0     | 3      | 0      | 0      | 0      | 0      | 0      | 0      | 0 | 0  | 0  | 0  | 4       |
| Aspergillus gracilis        | 0      | 0      | 0      | 0     | 0      | 0      | 2      | 0      | 0      | 0      | 1      | 0 | 0  | 0  | 0  | 3       |
| Mortierella fatschederae    | 3      | 0      | 0      | 0     | 0      | 0      | 0      | 0      | 0      | 0      | 0      | 0 | 0  | 0  | 0  | 3       |
| Derxomyces pseudoschimicola | 3      | 0      | 0      | 0     | 0      | 0      | 0      | 0      | 0      | 0      | 0      | 0 | 0  | 0  | 0  | 3       |
| Strelitziana mali           | 2      | 1      | 0      | 0     | 0      | 0      | 0      | 0      | 0      | 0      | 0      | 0 | 0  | 0  | 0  | 3       |
| Periconia pseudobyssoides   | 0      | 3      | 0      | 0     | 0      | 0      | 0      | 0      | 0      | 0      | 0      | 0 | 0  | 0  | 0  | 3       |
| Pseudorobillarda phragmitis | 0      | 0      | 0      | 0     | 0      | 0      | 3      | 0      | 0      | 0      | 0      | 0 | 0  | 0  | 0  | 3       |
| Fusarium solani             | 0      | 0      | 0      | 0     | 0      | 3      | 0      | 0      | 0      | 0      | 0      | 0 | 0  | 0  | 0  | 3       |
| Microbotryomycetes sp       | 0      | 2      | 0      | 0     | 0      | 0      | 0      | 0      | 0      | 0      | 0      | 0 | 0  | 0  | 0  | 2       |
| All                         | 332586 | 340042 | 134747 | 30892 | 226128 | 204925 | 238452 | 197802 | 233295 | 264019 | 243107 | 8 | 18 | 31 | 54 | 2446106 |

---
